# Supplementary material for: Perspectives on Harm Reduction Kit Implementation in Heterogeneous Outpatient Clinics
Source: Research Square preprint supplement (doi:10.21203/rs.3.rs-6059606/v1), 2026-01-25
Supplement: Supplementary file 1 [file 6b621b1fddbd4308eb953165.docx]

**Pre-implementation Focus Group:**

Focus Group Questions

Can you all tell me what you know about harm reduction – what kind of services do you think fit within the category of harm reduction? How do you feel about offering them?

1. Tell me about your experiences with harm reduction services for people who use substances, either here or in previous workplaces.
2. What harm reduction services are currently being provided at your clinic? Tell me a little bit more about how these services were rolled out?
   1. To what extent do these services at your clinic meet the existing needs of your patients?
   2. What other harm reduction services at your clinic may benefit your patients? What are some reasons why these services aren’t currently being offered at your clinic?

DESCRIPTION OF INTERVENTION: Our intervention involves the integration of harm reduction kits into the outpatient addiction treatment setting. These kits include safer injection, safer smoking, safer snorting, safer boofing (also known as per rectal administration), fentanyl test strips, xylazine test strips, and wound care. Each of these kits will contain supplies that encourage and allow for safer use of substances. All kits will be paired with a patient educational pamphlet that describes use of provided supplies in addition to other harm reduction practices. All patients with a substance use disorder will be universally offered a menu of available kits to choose from upon check-in.

1. How do you envision these harm reduction services being provided in your practice? What would it look like?
   1. How will the current clinic infrastructure affect the implementation of this intervention? How will it facilitate/hinder the implementation?
   2. How would this intervention fit into your current workflow?
   3. Who in the clinic would provide this intervention?
   4. What kind of clinic infrastructure changes will be needed to accommodate the intervention?
   5. What support will you or your team need for successful implementation? (e.g., technical assistance, additional training, protected staff time)
2. What are some of your other clinic priorities and where would this intervention fit in?
3. Tell us about your clinic culture related to new interventions? How about related to harm reduction services?
4. How do you think other staff and providers might respond to this service being delivered in your practice?
5. How might federal, state, or local regulations or laws impact the implementation of these services in your practice? What are you worried about? What might your patients be worried about?

**Post-implementation focus group:**

Focus Group Questions

1. Tell me about your experiences with harm reduction kits distribution at your clinic?
   1. What things were successful
   2. What things were not?
   3. What was the experience with pharmacy partnerships?
2. Have you noticed any changes to patient interactions have you noticed since harm reduction kit implementation? How about provider/staff interactions? If so, tell me about those.
3. Describe how well-equipped you felt to deliver the program based on the training you received? ( ie: delivery of harm reduction counseling along with kit distribution)?
4. Let’s talk about workflow: How well were you able to adapt to the clinic workflow? What changes did you make over the 6 months and why? Anything you would want to change in the workflow for the future?
5. Any unexpected events that the clinic could have avoided? (ie: Sharps disposal, state distribution, patient volume, storage, etc)
6. Do you feel like providing the kits has brought about any changes in your clinic? If so, tell me about that.
7. Were there any other programs, or issues, going on at the clinic during implementation that you think affected distribution of the harm reduction kits?
8. How did federal, state, or local regulations or laws impact the delivery of these services in your clinic, if at all? What things were you or your patients worried about?
9. Does the clinic have any plans to sustain delivery of the harm reduction kits? Tell me more about that.
10. Do you think that continuing to provide these fits with clinic priorities and goals? Why or why not?
