# Supplementary material for: Perspectives on Harm Reduction Kit Implementation in Heterogeneous Outpatient Clinics
Source: Research Square preprint supplement (doi:10.21203/rs.3.rs-6059606/v1), 2026-01-25
Supplement: Supplementary file 2 [file 9e99225a84f15d1e614ede7f.docx]

**Table 1: Staff and provider participants by type in pre- and post-implementation focus groups**

|  | **Pre-implementation** | **Post-implementation** |
| --- | --- | --- |
| **Providers**  Physician  Nurse practitioner  Cliniciansa | 2  1  2 | 3  1  2 |
| **Staff**  Nurse  Administrator  Peer navigator  Care manager/coordinator | 1  2  2  1 | 1  1  1  2 |

aClinicians are defined as licensed clinical social worker. We included clinicians at one of the participating COEs in the provider focus group as they functioned primarily as a behavioral health entity.
